# Supplementary material for: Source-detector trajectory optimization for FOV extension in dental CBCT imaging
Source: PubMed Central journal article supplement — Comput Struct Biotechnol J. 2024 Nov 8;24:679–89. doi: 10.1016/j.csbj.2024.11.010 (PMC11602572; doi:10.1016/j.csbj.2024.11.010), 2024-11-08
Supplement: mmc1.pdf [file mmc1.pdf]

# Source-detector trajectory optimization for FOV extension in dental CBCT imaging: Supplementary Materials

S M Ragib Shahriar Islam<sup>a,b,c</sup>, Ander Biguri<sup>d</sup>, Claudio Landi<sup>e</sup>, Giovanni Di Domenico<sup>f</sup>, Benedikt Schneider<sup>g</sup>, Pascal Grün<sup>g</sup>, Cristina Sarti<sup>e</sup>, Ramona Woitek<sup>b</sup>, Andrea Delmiglio<sup>e</sup>, Carola-Bibiane Schönlieb<sup>d</sup>, Dritan Turhani<sup>g</sup>, Gernot Kronreif<sup>a</sup>, Wolfgang Birkfellner<sup>c</sup>, Sepideh Hatamikia<sup>b,a</sup>

<sup>a</sup>*Austrian Center for Medical Innovation and Technology, Wiener Neustadt, Austria*

<sup>b</sup>*Department of Medicine, Danube Private University, Krems, Austria*

<sup>c</sup>*Center for Medical Physics and Biomedical Engineering, Medical University Vienna, Vienna, Austria*

<sup>d</sup>*Department of Applied Mathematics and Theoretical Physics, University of Cambridge, Cambridge, United Kingdom*

<sup>e</sup>*SeeThrough SrL, Via Bolgara 2, Brusaporto (BG), Italy*

<sup>f</sup>*Department of Physics and Earth Science, University of Ferrara, Ferrara, Italy*

<sup>g</sup>*Center for Oral and Maxillofacial Surgery, Department of Dentistry, Faculty of Medicine and Dentistry, Danube Private University, Steiner Landstraße 124, Krems, 3500, Austria*

---

---

## Appendix A. Search space for the valid and invalid region of the trajectory

There is a 11cm  $\times$  6cm rectangular space where the iso-center can be dynamically placed during the scan. Therefore, considering the circular trajectory, for every possible iso-center location, there is a certain valid and invalid limited angular portion of the trajectory. In Figure A.1 (A), (B), (C), (D), (E), the iso-center is placed at the middle, extreme left-front, extreme right-front, extreme left-back, and extreme right-back positions respectively, and delineates the valid (black line) and non-valid (red line) portion of the circular trajectory. Figure A.1 (F) shows the valid and invalid portions for all the extreme points. Similarly, the iso-center location is considered at 1cm, and all the possible valid and invalid portion is calculated as Figure

A.1 (G). The combination of all these projection angles for valid and non-valid portions of the circular trajectory at every possible iso-center location is considered as the search space for the proposed trajectory.

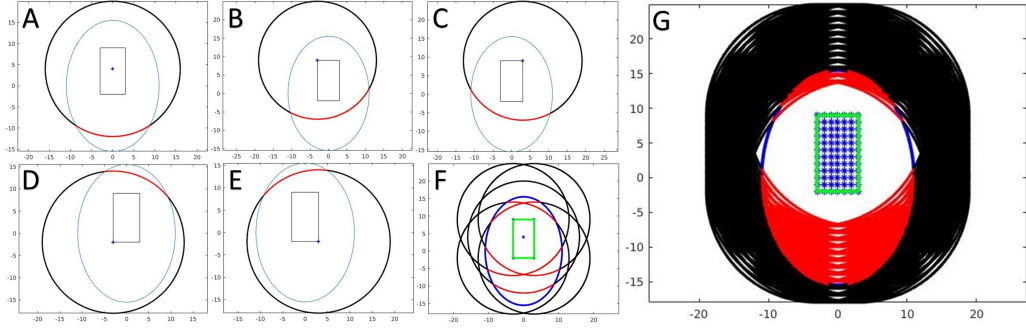

Figure A.1: The limited angle circular trajectory when the iso-center is at **A**: the centroid, **B**: Up-Left, **C**: Up-Right, **D**: Down-Left, and **E**: Down-Right of the possible iso-center moving region. Illustration of the possible detector movement space and collision area considering **F**: iso-centers at Figure A, B, C, D, E together and **G**: iso-centers at all the possible position at 1cm apart in the rectangle region.

## Appendix B. The Peak Signal to Noise Ratio (PSNR)

PSNR is one of the most widely used image quality metrics to evaluate the signal fidelity of a reconstructed image compared to the ground truth image. PSNR does not directly measure the visual quality of an image, rather it measures the similarity of the signal fidelity between two images. However, the visual quality and the measurement of signal fidelity are highly correlated. The PSNR value of more than 30dB is considered as good image reconstruction fidelity [1]. The expression of the PSNR is based on the Mean Squared Error (MSE) as follows,

$$MSE = \frac{1}{m \times n \times p} \sum_{i=1}^m \sum_{j=1}^n \sum_{k=1}^p [V(i, j, k) - \hat{V}(i, j, k)]^2 \quad (\text{B.1})$$

where  $V$  is the ground truth image and  $\hat{V}$  is the reconstructed image.  $m \times n \times p$  and  $i, j, k$  are the volume size and voxel values respectively.

From the MSE value, the PSNR is calculated in dB as follows where the

$MAX$  is the maximum possible value of a voxel.

$$PSNR = 10 \cdot \log_{10} \left( \frac{MAX^2}{MSE} \right) \quad (\text{B.2})$$

### Appendix C. Structural Similarity Index Measurements (SSIM)

SSIM measures the quality of an image in terms of the visual appearance of the image. It measures the similarity between two images in terms of the luminance, contrast, and structure of the image ([2]). The mathematical model of SSIM is defined as

$$SSIM(V, \hat{V}) = \frac{(2\mu_V\mu_{\hat{V}} + c_1)(2\sigma_{V\hat{V}} + c_2)}{(\mu_V^2 + \mu_{\hat{V}}^2 + c_1)(\sigma_V^2 + \sigma_{\hat{V}}^2 + c_2)} \quad (\text{C.1})$$

where  $\mu_V$  and  $\mu_{\hat{V}}$  are the average voxel value of image  $V$  and  $\hat{V}$ , respectively.  $\sigma_{V\hat{V}}$  represents the covariance between the two images. And  $\sigma_V^2$  and  $\sigma_{\hat{V}}^2$  are the variances of voxels values of image  $V$  and  $\hat{V}$ , respectively.  $c_1$  and  $c_2$  are two constant values that stabilize the division if the mean, variance, or covariance elements get tend to zero. By measuring “ $\mu_V$  and  $\mu_{\hat{V}}$ ”, “ $\sigma_V^2$  and  $\sigma_{\hat{V}}^2$ ”, and “ $\sigma_{V\hat{V}}$ ” SSIM measures and compares “luminance”, “contrast”, and “structure similarity” between the images  $V$  and  $\hat{V}$  respectively. The range of the SSIM metric is between 0 and 1. The closer the SSIM value to 1, indicates the better the image quality to be [1, 2].

### Appendix D. Universal Quality Index (UQI):

UQI is another widely used metric which also measure the visual appearance of the reconstructed image in therns of the luminance, contrast, and structural information [3]. The mathematical expression of UQI is as follows,

$$UQI = \frac{2\sigma_{V\hat{V}}}{\sigma_V^2\sigma_{\hat{V}}^2} \cdot \frac{2\mu_V\mu_{\hat{V}}}{\mu_V^2 + \mu_{\hat{V}}^2} \quad (\text{D.1})$$

where,  $\sigma_{V\hat{V}}$ ,  $\sigma_{V,\hat{V}}^2$ , and  $\mu_{V,\hat{V}}$  are the covariance, variances, and means of the voxel values respectively for the images  $V$  and  $\hat{V}$ . The UQI measurement has been added as it also measures the visual quality of the image as SSIM, however, in a different way. Therefore, the SSIM and UQI values can be cross-checked to support each other. The UQI also ranges from 0 to 1 as same as the SSIM measurement, closer the value to 1 indicates the better image quality.

## Appendix E. Root Mean Squared Error (RMSE)

The RMSE is one of the fundamental and most widely used metrics for measuring predicted and actual data. In the case of image reconstruction, it is calculated as the square root of the mean of the squared differences between the corresponding voxels of the two images. The expression of the RMSE is as follows.

$$RMSE(V, \hat{V}) = \sqrt{\frac{1}{m \times n \times p} \sum_{i=1}^m \sum_{j=1}^m \sum_{k=1}^p [V(i, j, k) - \hat{V}(i, j, k)]^2} \quad (\text{E.1})$$

The range of RMSE depends on the range of voxel values. For our study, all the images were normalized in the range of 0 and 1. Therefore, the RMSE range is also limited to the same range. However, as RMSE is residual voxel-to-voxel error measurement, closer the value to 0, indicates better image quality as it refers to the minimal error.



## Appendix F. Extended quantitative measurement of reconstructed images

| Trajectory                                    | VOI       | PSNR    |             | SSIM   |             | UQI    |             | RMSE   |             |
|-----------------------------------------------|-----------|---------|-------------|--------|-------------|--------|-------------|--------|-------------|
|                                               |           | In VOI  | Whole slice | in VOI | Whole slice | in VOI | Whole slice | in VOI | Whole slice |
| Circular;<br>OSSART                           | Sinus     | 28.5935 | 21.1281     | 0.9792 | 0.7520      | 0.8921 | 0.8755      | 0.0372 | 0.0878      |
|                                               | TMJ       | 37.4164 | 22.1337     | 0.9935 | 0.7789      | 0.9599 | 0.8929      | 0.0135 | 0.0782      |
|                                               | Upper Jaw | 25.7520 | 22.7246     | 0.9542 | 0.8170      | 0.9274 | 0.9164      | 0.0516 | 0.0731      |
|                                               | Lower Jaw | 27.4749 | 25.0951     | 0.9672 | 0.8597      | 0.9467 | 0.9453      | 0.0423 | 0.0556      |
|                                               | Chin      | 31.1546 | 27.0987     | 0.9834 | 0.9080      | 0.9505 | 0.9500      | 0.0277 | 0.0442      |
| Fusion;<br>OSSART                             | Sinus     | 36.1103 | 30.7057     | 0.9837 | 0.8686      | 0.9873 | 0.9877      | 0.0156 | 0.0292      |
|                                               | TMJ       | 43.2929 | 31.1151     | 0.9948 | 0.8672      | 0.9895 | 0.9875      | 0.0068 | 0.0278      |
|                                               | Upper Jaw | 32.6921 | 30.8363     | 0.9598 | 0.8996      | 0.9884 | 0.9878      | 0.0232 | 0.0287      |
|                                               | Lower Jaw | 33.4874 | 31.3960     | 0.9691 | 0.9084      | 0.9891 | 0.9884      | 0.0212 | 0.0269      |
|                                               | Chin      | 35.1400 | 32.1087     | 0.9816 | 0.9148      | 0.9860 | 0.9870      | 0.0175 | 0.0248      |
| Fusion;<br>ASDPOCS                            | Sinus     | 46.6413 | 40.1683     | 0.9962 | 0.9665      | 0.9991 | 0.9987      | 0.0047 | 0.0098      |
|                                               | TMJ       | 53.8594 | 41.5986     | 0.9991 | 0.9688      | 0.9993 | 0.9990      | 0.0020 | 0.0083      |
|                                               | Upper Jaw | 45.0462 | 42.8082     | 0.9946 | 0.9832      | 0.9994 | 0.9993      | 0.0056 | 0.0072      |
|                                               | Lower Jaw | 45.7294 | 43.3618     | 0.9962 | 0.9860      | 0.9995 | 0.9994      | 0.0052 | 0.0068      |
|                                               | Chin      | 49.0815 | 45.7565     | 0.9986 | 0.9912      | 0.9995 | 0.9995      | 0.0035 | 0.0052      |
| Fusion;<br>OSSART;<br>Reduced<br>projections  | Sinus     | 35.1702 | 30.3879     | 0.9829 | 0.8696      | 0.9851 | 0.9869      | 0.0174 | 0.0302      |
|                                               | TMJ       | 43.2229 | 30.9937     | 0.9950 | 0.8743      | 0.9896 | 0.9871      | 0.0069 | 0.0282      |
|                                               | Upper Jaw | 32.1469 | 30.4541     | 0.9609 | 0.9027      | 0.9874 | 0.9869      | 0.0247 | 0.0300      |
|                                               | Lower Jaw | 33.0697 | 31.1404     | 0.9704 | 0.9140      | 0.9885 | 0.9879      | 0.0222 | 0.0277      |
|                                               | Chin      | 34.3213 | 31.6757     | 0.9831 | 0.9245      | 0.9838 | 0.9858      | 0.0192 | 0.0261      |
| Fusion;<br>ASDPOCS;<br>Reduced<br>projections | Sinus     | 41.1827 | 35.3547     | 0.9941 | 0.9499      | 0.9963 | 0.9959      | 0.0087 | 0.0171      |
|                                               | TMJ       | 49.0731 | 36.6566     | 0.9987 | 0.9573      | 0.9975 | 0.9967      | 0.0035 | 0.0147      |
|                                               | Upper Jaw | 38.9620 | 36.9718     | 0.9923 | 0.9716      | 0.9974 | 0.9972      | 0.0113 | 0.0142      |
|                                               | Lower Jaw | 39.5378 | 37.5330     | 0.9945 | 0.9765      | 0.9974 | 0.9973      | 0.0105 | 0.0133      |
|                                               | Chin      | 41.5771 | 38.5493     | 0.9977 | 0.9856      | 0.9967 | 0.9971      | 0.0083 | 0.0118      |

Table F.1: Jerry: Quality measurement scores in different VOIs for different trajectories and corresponding reconstruction algorithms. Measurement is taken at the most prominent slices of the respected VOI along the z-axis. **In VOI:** measurement only inside each VOI region; **Whole Slice:** measurement in the whole slice related to each VOI.

| Trajectory                             | PSNR     |                | SSIM     |                | UQI      |                | RMSE     |                |
|----------------------------------------|----------|----------------|----------|----------------|----------|----------------|----------|----------------|
|                                        | (in VOI) | (Whole Volume) |
| Circular;OSSART                        | 31.8048  | 25.9080        | 0.9880   | 0.9373         | 0.9342   | 0.9160         | 0.0257   | 0.0507         |
| Fusion;OSSART                          | 38.2879  | 33.3871        | 0.9896   | 0.9444         | 0.9886   | 0.9879         | 0.0122   | 0.0214         |
| Fusion;ASDPOCS                         | 50.3861  | 45.0632        | 0.9986   | 0.9917         | 0.9994   | 0.9993         | 0.0030   | 0.0056         |
| Fusion;OSSART;<br>Reduced projections  | 37.7906  | 33.1499        | 0.9899   | 0.9491         | 0.9878   | 0.9875         | 0.0129   | 0.0220         |
| Fusion;ASDPOCS;<br>Reduced projections | 44.2543  | 38.6958        | 0.9979   | 0.9885         | 0.9972   | 0.9967         | 0.0061   | 0.0116         |

Table F.2: Jerry: Quality measurement scores measured in the whole reconstructed volume for different trajectories and corresponding reconstruction algorithms. **In VOI:** measurement in the total VOI region (related to all five VOIs); **Whole Volume:** measurement in the whole reconstructed volume containing the VOI.

| Trajectory                                    | VOI       | PSNR     |               | SSIM     |               | UQI      |               | RMSE     |               |
|-----------------------------------------------|-----------|----------|---------------|----------|---------------|----------|---------------|----------|---------------|
|                                               |           | (in VOI) | (Whole slice) |
| Circular;<br>OSSART                           | Sinus     | 24.8817  | 15.5644       | 0.9567   | 0.6810        | 0.1520   | 0.0927        | 0.0570   | 0.1666        |
|                                               | TMJ       | 31.8350  | 15.7035       | 0.9892   | 0.6824        | 0.1599   | 0.0903        | 0.0256   | 0.1640        |
|                                               | Upper Jaw | 20.8897  | 15.8851       | 0.9354   | 0.7131        | 0.0824   | 0.0830        | 0.0903   | 0.1606        |
|                                               | Lower Jaw | 21.4372  | 16.3203       | 0.9432   | 0.7202        | 0.1108   | 0.0962        | 0.0848   | 0.1528        |
|                                               | Chin      | 23.4239  | 17.2051       | 0.9630   | 0.7802        | 0.1068   | 0.1059        | 0.0674   | 0.1380        |
| Fusion;<br>OSSART                             | Sinus     | 38.7543  | 29.7584       | 0.9912   | 0.9164        | 0.9798   | 0.9726        | 0.0115   | 0.0325        |
|                                               | TMJ       | 45.7258  | 30.3802       | 0.9985   | 0.9158        | 0.9798   | 0.9755        | 0.0052   | 0.0303        |
|                                               | Upper Jaw | 34.9699  | 31.0197       | 0.9876   | 0.9233        | 0.9788   | 0.9786        | 0.0178   | 0.0281        |
|                                               | Lower Jaw | 35.5231  | 31.7132       | 0.9908   | 0.9303        | 0.9795   | 0.9803        | 0.0167   | 0.0260        |
|                                               | Chin      | 39.3963  | 33.9972       | 0.9960   | 0.9568        | 0.9853   | 0.9858        | 0.0107   | 0.0200        |
| Fusion;<br>ASDPOCS                            | Sinus     | 47.8494  | 35.2701       | 0.9976   | 0.9599        | 0.9975   | 0.9932        | 0.0041   | 0.0172        |
|                                               | TMJ       | 53.1047  | 34.8657       | 0.9997   | 0.9592        | 0.9967   | 0.9922        | 0.0022   | 0.0181        |
|                                               | Upper Jaw | 45.2907  | 37.6667       | 0.9977   | 0.9641        | 0.9979   | 0.9958        | 0.0054   | 0.0131        |
|                                               | Lower Jaw | 45.8654  | 39.1038       | 0.9989   | 0.9703        | 0.9980   | 0.9968        | 0.0051   | 0.0111        |
|                                               | Chin      | 48.4115  | 40.2593       | 0.9993   | 0.9770        | 0.9981   | 0.9970        | 0.0038   | 0.0097        |
| Fusion;<br>OSSART;<br>Reduced<br>projections  | Sinus     | 40.3104  | 31.2519       | 0.9909   | 0.9085        | 0.9899   | 0.9842        | 0.0096   | 0.0274        |
|                                               | TMJ       | 47.1235  | 30.7181       | 0.9984   | 0.9047        | 0.9901   | 0.9813        | 0.0044   | 0.0291        |
|                                               | Upper Jaw | 36.5774  | 31.3960       | 0.9885   | 0.9083        | 0.9893   | 0.9840        | 0.0148   | 0.0269        |
|                                               | Lower Jaw | 37.1682  | 33.0961       | 0.9909   | 0.9284        | 0.9901   | 0.9889        | 0.0139   | 0.0221        |
|                                               | Chin      | 42.7239  | 36.6161       | 0.9963   | 0.9524        | 0.9957   | 0.9944        | 0.0073   | 0.0148        |
| Fusion;<br>ASDPOCS;<br>Reduced<br>projections | Sinus     | 40.2724  | 31.3741       | 0.9919   | 0.9195        | 0.9896   | 0.9841        | 0.0097   | 0.0270        |
|                                               | TMJ       | 46.5171  | 31.1403       | 0.9980   | 0.9240        | 0.9883   | 0.9824        | 0.0047   | 0.0277        |
|                                               | Upper Jaw | 37.3895  | 31.7105       | 0.9908   | 0.9313        | 0.9907   | 0.9844        | 0.0135   | 0.0260        |
|                                               | Lower Jaw | 38.1525  | 33.8002       | 0.9924   | 0.9488        | 0.9919   | 0.9902        | 0.0124   | 0.0204        |
|                                               | Chin      | 42.7103  | 36.5687       | 0.9966   | 0.9621        | 0.9954   | 0.9941        | 0.0073   | 0.0148        |

Table F.3: Tom: Quality measurement scores in different VOIs for different trajectories and corresponding reconstruction algorithms. Measurement is taken at the most prominent slices of the respected VOI along the z-axis. **In VOI:** measurement only inside each VOI region; **Whole Slice:** measurement in the whole slice related to each VOI.

| Trajectory                             | PSNR     |                | SSIM     |                | UQI      |                | RMSE     |                |
|----------------------------------------|----------|----------------|----------|----------------|----------|----------------|----------|----------------|
|                                        | (in VOI) | (Whole Volume) |
| Circular;OSSART                        | 27.8173  | 21.3781        | 0.9826   | 0.9075         | 0.0989   | 0.0904         | 0.0407   | 0.0853         |
| Fusion;OSSART                          | 42.4092  | 36.7414        | 0.9978   | 0.9805         | 0.9814   | 0.9817         | 0.0076   | 0.0145         |
| Fusion;ASDPOCS                         | 51.9708  | 42.8008        | 0.9996   | 0.9910         | 0.9978   | 0.9961         | 0.0025   | 0.0072         |
| Fusion;OSSART;<br>Reduced projections  | 44.2972  | 37.5982        | 0.9980   | 0.9777         | 0.9917   | 0.9897         | 0.0061   | 0.0132         |
| Fusion;ASDPOCS;<br>Reduced projections | 44.6559  | 37.6372        | 0.9981   | 0.9819         | 0.9921   | 0.9891         | 0.0059   | 0.0131         |

Table F.4: Tom: Quality measurement scores measured in the whole reconstructed volume for different trajectories and corresponding reconstruction algorithms. **In VOI:** measurement in the total VOI region (related to all five VOIs); **Whole Volume:** measurement in the whole reconstructed volume containing the VOI.

## Appendix G. Detailed FOV measurements

| Trajectory          | Sinus |        | TMJ   |        | Upper Jaw |        | Lower Jaw |        | Chin  |        |
|---------------------|-------|--------|-------|--------|-----------|--------|-----------|--------|-------|--------|
|                     | Cran. | N.O.   | Cran. | N.O.   | Cran.     | N.O.   | Cran.     | N.O.   | Cran. | N.O.   |
| Circular;<br>OSSART | 11cm  | 11cm   | 11cm  | 11cm   | 11cm      | 11cm   | 11cm      | 11cm   | 11cm  | 11cm   |
| Fusion;<br>OSSART   | 14cm  | 16.5cm | 14cm  | 16.5cm | 14cm      | 15.5cm | 14cm      | 15.5cm | 11cm  | 15.5cm |
| Fusion;<br>ASDPOCS  | 14cm  | 16.5cm | 14cm  | 16.5cm | 14cm      | 15.5cm | 14cm      | 15.5cm | 11cm  | 15.5cm |

Table G.5: Jerry: The measured FOV in the axial axis of different VOIs containing slices from the reconstructed images using different trajectories. (Cran.: In Cranial breadth; N.O: In Naso-occipital length)

| Trajectory          | Sinus |        | TMJ   |        | Upper Jaw |        | Lower Jaw |        | Chin   |        |
|---------------------|-------|--------|-------|--------|-----------|--------|-----------|--------|--------|--------|
|                     | Cran. | N.O.   | Cran. | N.O.   | Cran.     | N.O.   | Cran.     | N.O.   | Cran.  | N.O.   |
| Circular;<br>OSSART | 11cm  | 11cm   | 11cm  | 11cm   | 11cm      | 11cm   | 11cm      | 11cm   | 11cm   | 11cm   |
| Fusion;<br>OSSART   | 15cm  | 19.5cm | 15cm  | 19.5cm | 15cm      | 18.5cm | 15cm      | 18.5cm | 12.5cm | 18.5cm |
| Fusion;<br>ASDPOCS  | 15cm  | 19.5cm | 15cm  | 19.5cm | 15cm      | 18.5cm | 15cm      | 18.5cm | 12.5cm | 18.5cm |

Table G.6: Tom: The measured FOV in the axial axis of different VOIs containing slices from the reconstructed images using different trajectories.(Cran.: In Cranial breadth; N.O: In Naso-occipital length)

## Appendix H. Image quality measurement score characteristics for different trajectory and reconstruction techniques

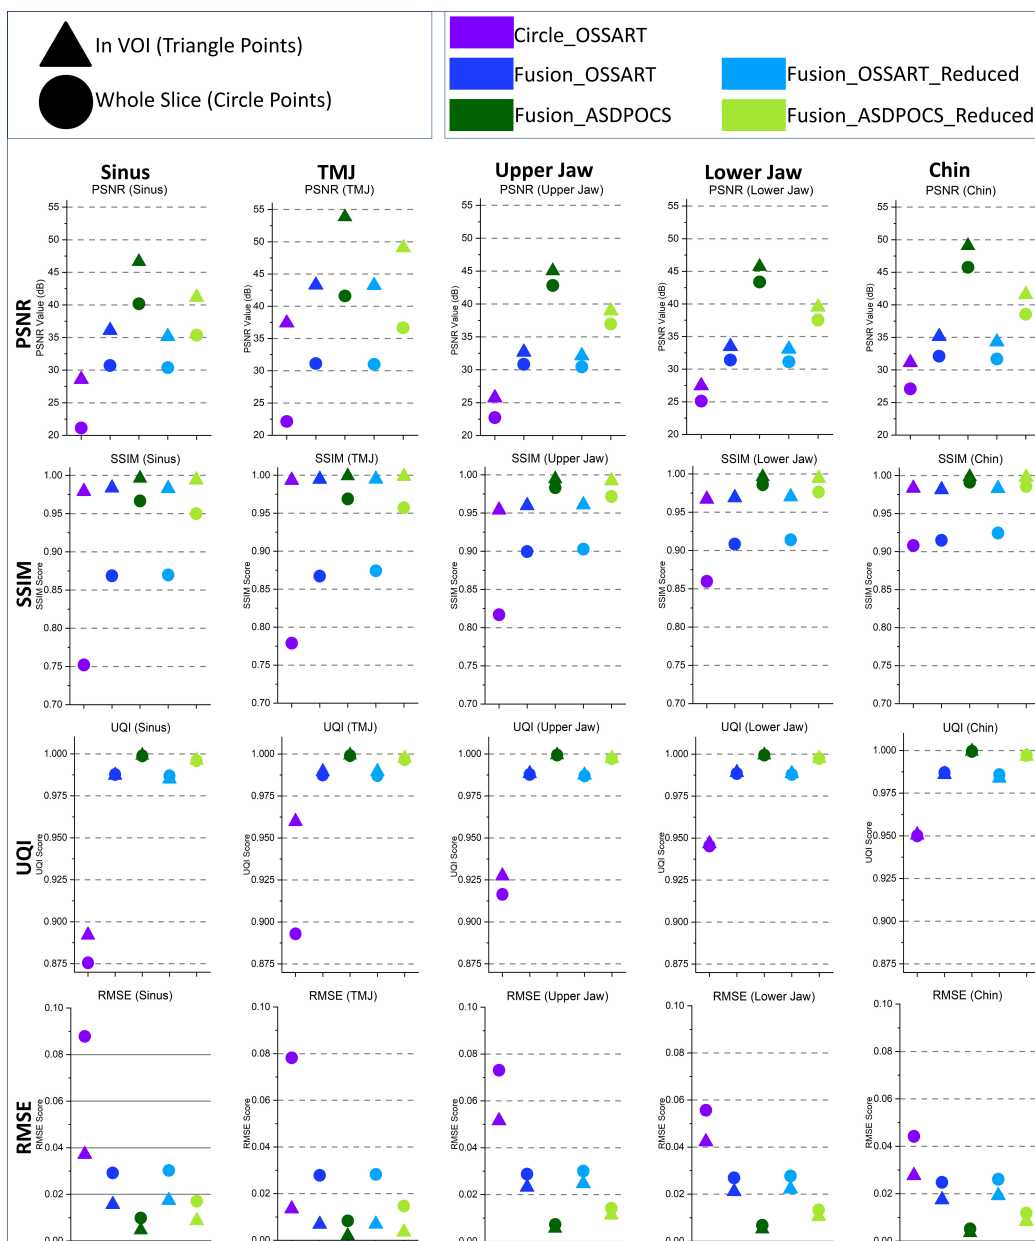

Figure H.2: Image quality measurement score characteristics in Jerry

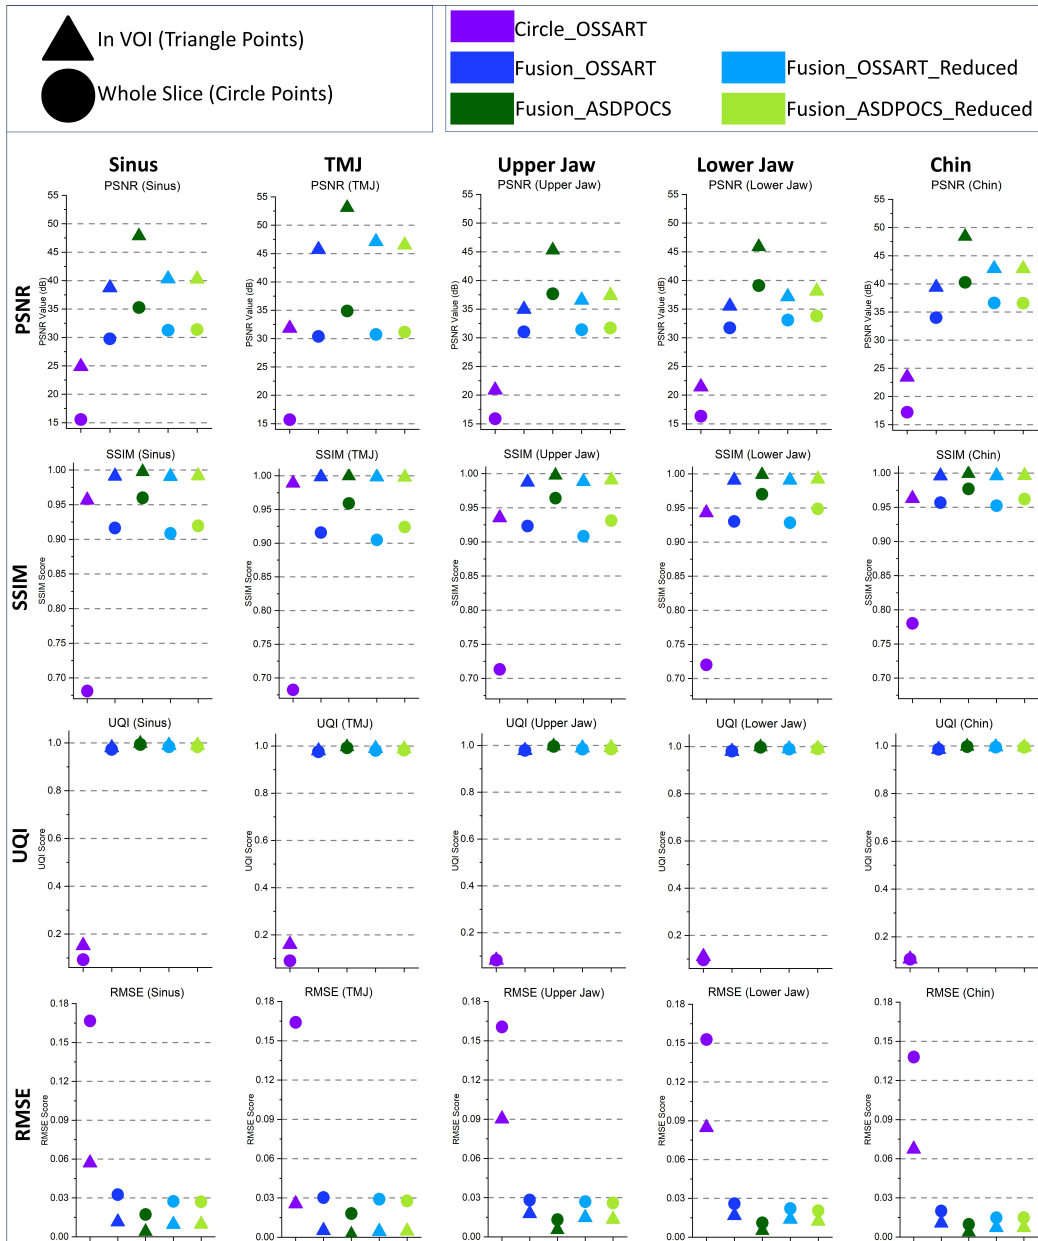

Figure H.3: Image quality measurement score characteristics in Tom

## References

- [1] A. Hore, D. Ziou, Image quality metrics: PSNR vs. SSIM, in: 2010 20th international conference on pattern recognition, IEEE, 2010, pp. 2366–

2369.

- [2] Z. Wang, A. C. Bovik, H. R. Sheikh, E. P. Simoncelli, Image quality assessment: from error visibility to structural similarity, *IEEE transactions on image processing* 13 (4) (2004) 600–612.
- [3] Z. Wang, A. C. Bovik, A universal image quality index, *IEEE signal processing letters* 9 (3) (2002) 81–84.
